# Supplementary material
Source: PubMed Central journal article supplement (PMC4367871)
Supplement: NIHMS658789-supplement-Supplemental_figure_2.pdf [file NIHMS658789-supplement-Supplemental_figure_2.pdf]

Enable 3D View
